# Supplementary material
Source: PubMed Central journal article supplement (PMC4304901)
Supplement: NIHMS645953-supplement-2.pdf [file NIHMS645953-supplement-2.pdf]

**Table 1**

| Inhibitor        | $k_{\text{obs}}/I$ ( $\text{M}^{-1}\text{s}^{-1}$ ) |
|------------------|-----------------------------------------------------|
| biotin-LVSR-AOMK | $9.1 (\pm 1.6) \times 10^3$                         |
| Cy5-LVSR-AOMK    | $9.3 (\pm 1.6) \times 10^3$                         |
| Z-VRPR-FMK       | $6.0 (\pm 0.7) \times 10^3$                         |
